# Supplementary material
Source: publisher figshare collection journal article supplement (https://scielo.figshare.com/articles/dataset/_/6151475)
Supplement: Supplementary file 1 [file Table_1.xls]

## Sheet: Table_1
<b>Variable</b>		<b>Coefficient ()</b>	<b>Standard error</b>	<b><em>p</em>-value (<em>a</em> = 1%)</b>	<b>CI (: 95%)</b>
(Intercept)		-3.33	0.10	3.84E-266	-
pmmp1	x1	1.20	0.08	3.87E-49	(1.07; 1.34)
pmmp2	x2	1.08	0.08	3.13E-37	(0.94; 1.22)
pmmp3	x3	1.32	0.12	8.30E-30	(1.13; 1.51)
sga1	x4	0.46	0.06	2.93E-13	(0.36; 0.57)
uc1	x5	0.58	0.07	3.42E-18	(0.47; 0.69)
uf1	x6	0.58	0.07	1.48E-16	(0.46; 0.69)
uh1	x7	0.28	0.05	1.95E-09	(0.20; 0.36)
pt100CV1	x8	0.65	0.08	9.35E-15	(0.51; 0.79)
pt100CV2	x9	1.06	0.15	8.69E-13	(0.82; 1.30)
ui1	x10	0.53	0.06	2.42E-18	(0.43; 0.63)
tem1	x11	0.67	0.08	1.52E-16	(0.54; 0.80)
at1	x12	0.4	0.04	2.27E-19	(0.33; 0.48)
as1	x13	0.41	0.07	3.54E-09	(0.30; 0.52)
ap1	x14	0.55	0.16	4.51E-04	(0.29; 0.81)
tl1	x15	0.18	0.07	6.62E-03	(0.07; 0.29)
tl2	x16	0.26	0.06	2.77E-05	(0.16; 0.36)
tl3	x17	-0.01	0.08	9.46E-01	(0.14; 0.12)
