# Supplementary material
Source: publisher figshare collection journal article supplement (https://scielo.figshare.com/articles/dataset/_/6151475)
Supplement: Supplementary file 2 [file Table_2.xls]

## Sheet: Table_2
<b>Group</b>	<b>Quantity</b>	<b>Categorical variable (+= present, −= absent)</b>	<b>Abbreviation</b>	<b>Component 1</b>	<b>Component 2</b>
Provisioning (Type/pasture maintenance/Supplementation)	1	Pasture+ mineral salt (−)	psm:0	0.1206	0.0778
	2	pasture+ mineral salt (+)	psm:1	-0.5371	-0.3464
	3	pasture+salt+urea (−)	psmu:0	0.0086	0.0026
	4	pasture+salt+urea (+)	psmu:1	-0.5048	-0.1508
	5	Supplementation (−)	pmmp:0	-0.5344	-0.3301
	6	Supplementation (< 0.5 kg per head/day) (+)	pmmp:1	0.1553	0.0603
	7	Supplementation (0.5-1.5 kg per head/day) (+)	pmmp:2	0.0427	0.1087
	8	Supplementation (> 1.5 kg per head/day) (+)	pmmp:3	0.2071	0.1415
	9	Supplementation, water (−)	sga:0	-0.3083	-0.2248
	10	Supplementation, water (+)	sga:1	0.1660	0.1211
	11	Application of lime (−)	uc:0	-0.2120	0.0340
	12	Application of lime (+)	uc:1	0.4575	-0.0733
	13	Use of fertilizers (−)	uf:0	-0.2202	0.0628
	14	Use of fertilizers (+)	uf:1	0.4090	-0.1166
	15	Use of herbicides (−)	uh:0	-0.1795	0.1235
	16	Use of herbicides (+)	uh:1	0.1197	-0.0823
Machinery/ Equipment	17	Use of tractors (−)	pt100CV:0	-0.5516	-0.0267
	18	Use of tractors of up to 100 hp (+)	pt100CV:1	0.1049	-0.0023
	19	Use of tractors of above 100 hp (+)	pt100CV:2	0.4139	0.1327
	20	Use of implements (−)	ui:0	-0.3768	0.0119
	21	Use of implements (+)	ui:1	0.1884	-0.0060
Management	22	Planning of breeding season (−)	tem:0	-0.0977	0.0387
	23	Planning of breeding season (+)	tem:1	0.5537	-0.2194
	24	Technical assistance (−)	at:0	-0.2297	0.0434
	25	Technical assistance (+)	at:1	0.2010	-0.0380
	26	Analysis of soils (−)	as:0	-0.1520	0.0819
	27	Analysis of soils (+)	as:1	0.3845	-0.2070
	28	Analysis of forage (−)	ap:0	-0.0198	0.0101
	29	Analysis of forage (+)	ap:1	0.5753	-0.2926
	30	Productive system with pasture rotation (+)	sp:1	-0.1184	0.2236
	31	Productive system with no pasture rotation (+)	sp:2	0.0177	-0.1415
	32	Density < 0.5 animals/ha (+)	tl:0	0.0909	0.0476
	33	Density of 0.5-1.0 animals/ha (+)	tl:1	-0.1399	-0.0697
	34	Density of 1.1-2.0 animals/ha (+)	tl:2	0.0343	-0.0217
	35	Density > 2.0 animals/ha (+)	tl:3	-0.0321	0.0203
