# Supplementary material
Source: publisher figshare collection journal article supplement (https://scielo.figshare.com/articles/dataset/_/6151475)
Supplement: Supplementary file 3 [file Table_3.xls]

## Sheet: Table_3
<b>Variable</b>	<b>Component 1</b>	<b>Component 2</b>
uc:1	9.14%	1.12%
uf:1	8.07%	3.14%
pmmp:0	7.87%	14.38%
pt100CV:0	7.69%	0.09%
psm:1	7.29%	14.51%
ui:0	6.52%	0.03%
tem:1	6.34%	4.76%
as:1	5.77%	8.01%
sga:0	4.58%	11.67%
uf:0	4.34%	1.69%
uc:0	4.23%	0.52%
at:0	3.39%	0.58%
ui:1	3.26%	0.02%
at:1	2.97%	0.51%
sga:1	2.47%	6.28%
as:0	2.28%	3.17%
uh:0	1.78%	4.02%
pmmp:1	1.66%	1.20%
psm:0	1.64%	3.26%
ap:1	1.52%	1.88%
uh:1	1.18%	2.68%
pt100CV:2	1.18%	0.58%
pt100CV:1	1.16%	0.00%
tem:0	1.12%	0.84%
pmmp:3	0.59%	1.32%
psmu:1	0.59%	0.25%
tl:2	0.40%	0.52%
tl:0	0.35%	6.04%
tl:3	0.31%	0.37%
sp:1	0.08%	0.15%
sp:2	0.07%	0.14%
pmmp:2	0.05%	1.56%
ap:0	0.05%	0.06%
tl:1	0.02%	4.62%
psmu:0	0.01%	0.00%
