# Supplementary material
Source: publisher figshare collection journal article supplement (https://scielo.figshare.com/articles/dataset/_/6151475)
Supplement: Supplementary file 4 [file Table_4.xls]

## Sheet: Table_4
<b>Beef production unit</b>	<b>Technological index</b>	<b>Beef production unit</b>	<b>Technological index</b>
1	82.64	31	95.85
2	33.63	32	77.21
3	52.50	33	86.76
4	51.25	34	33.63
5	85.20	35	5.37
6	93.64	36	14.31
7	51.75	37	32.30
8	54.24	38	21.93
9	59.15	39	90.02
10	88.39	40	15.84
11	74.46	41	57.20
12	51.25	42	21.76
13	37.99	43	12.24
14	71.71	44	10.53
15	93.15	45	87.44
16	37.99	46	4.44
17	80.38	47	65.48
18	73.69	48	15.71
19	52.25	49	90.02
20	46.26	50	38.23
21	3.46	51	93.64
22	30.79	52	45.02
23	6.36	53	41.10
24	4.44	54	77.21
25	34.98	55	56.95
26	40.37	56	66.82
27	68.57	57	57.69
28	47.75	58	26.50
29	6.01	59	24.23
30	88.39	60	56.71
